# Supplementary material for: Induction of dermal-epidermal separation in mice by passive transfer of antibodies specific to type VII collagen
Source: JCI journal article supplement (doi:10.1172/jci21386), 2005-04-01
Supplement: sd1 [file 1]

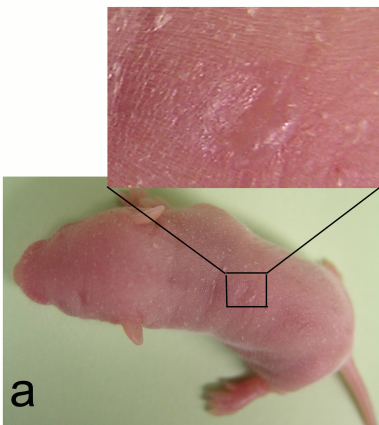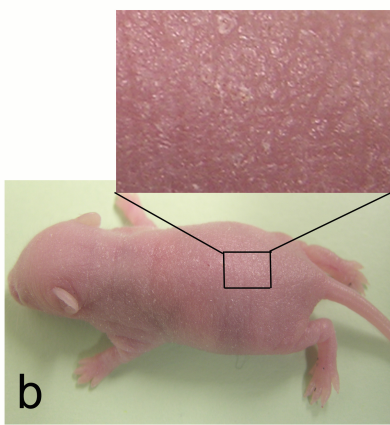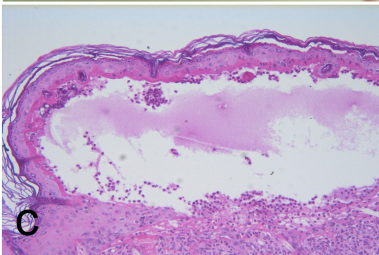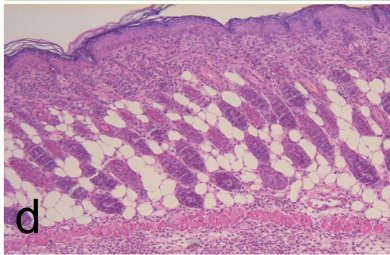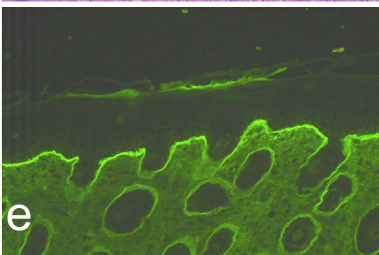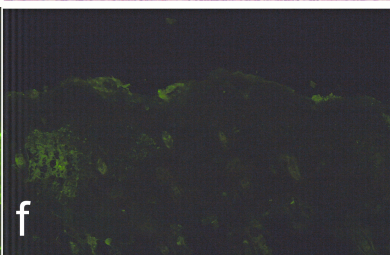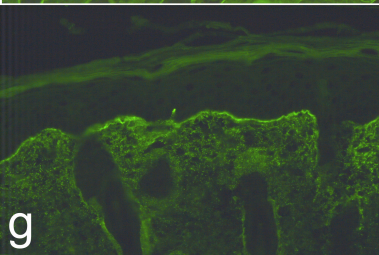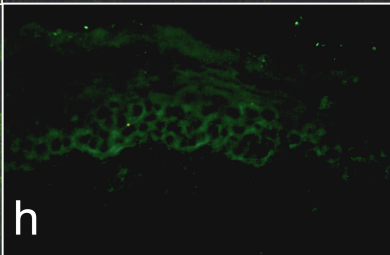

**Supplemental Figure 1.** Co-injection of granulocytes precipitates blister induction by antibodies to type VII collagen in neonatal mice. Three doses of rabbit antibodies to type VII collagen or control antibody (10 mg/body weight/day) were given subcutaneously 24 h apart to neonatal mice. After another 24 h, 50 ng of recombinant IL-8 and C5a were administered intradermally along with the 4th dose of antibodies and, subsequently,  $5 \times 10^6$  murine granulocytes were injected subcutaneously into the back of the mice. **(a)** Blister on the back of a neonate treated with pathogenic rabbit antibody to type VII collagen, but not in **(b)** a littermate injected with normal rabbit IgG (Insets show magnifications of injection sites). Histologic analysis of murine skin revealed **(c)** extensive subepidermal cleavage and a neutrophil-rich inflammatory infiltrate at the dermal-epidermal junction in the neonate injected with antibodies to type VII collagen (x200). In contrast, **(d)** a dermal and subcutaneous infiltration of neutrophils, but no significant recruitment of leukocytes at the dermal-epidermal junction and no subepidermal splits were seen in a new-born mouse treated with control antibody (x200). **(e)** Immunofluorescence analysis of lesional skin from a diseased mouse shows **(e)** rabbit IgG and **(g)** murine C3 deposits at the epidermal basement membrane, whereas in a mouse injected with control rabbit IgG, no deposits of **(f)** rabbit IgG or of **(h)** murine C3 are detected (x400).

Supplemental Table 1. EBA patients' autoantibodies show weaker binding to mouse skin than to human skin

| Sera                | IF microscopy <sup>A</sup> |             |
|---------------------|----------------------------|-------------|
|                     | Human skin                 | Murine skin |
| EBA 1               | 160                        | 160         |
| EBA 2               | 320                        | 20          |
| EBA 3               | 160                        | 0           |
| EBA 4               | 160                        | 0           |
| EBA 5               | 10                         | 10          |
| SA2953 <sup>B</sup> | 160                        | 20,480      |
| SA2954 <sup>B</sup> | 5,120                      | 20,480      |

<sup>A</sup>Serum reactivity to the DEJ was determined by IF microscopy using sections of non-split human and murine skin. Sera were titrated to end-point for IgG reactivity. <sup>B</sup>Immune rabbit serum.
